# Supplementary material for: Role of ID Proteins in BMP4 Inhibition of Profibrotic Effects of TGF-β2 in Human TM Cells
Source: PubMed Central journal article supplement (PMC5295782; doi:10.1167/iovs.16-20472), 2017-02
Supplement: iovs-58-01-13_s01.pdf [file iovs-58-01-13_s01.pdf]

## Supplementary Figure 1

### ID1-ID3 Expression in primary human TM cell strains

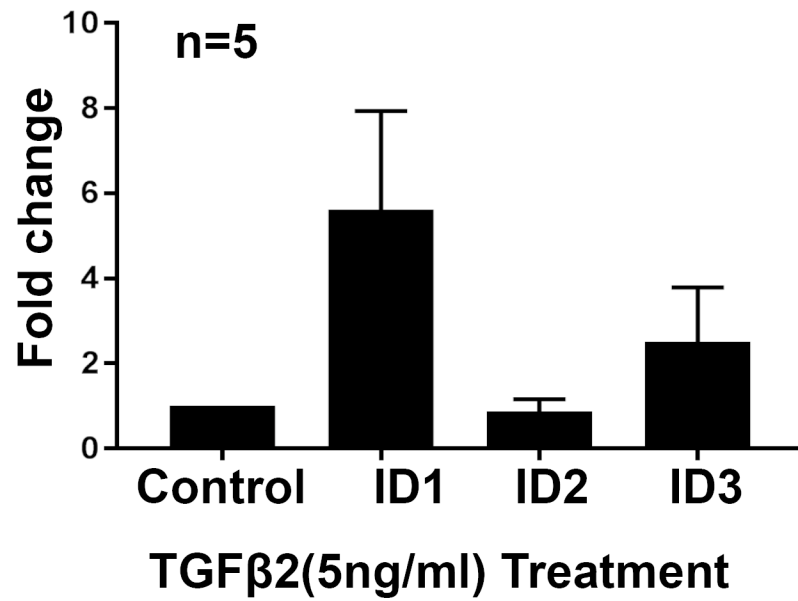

Supplemenatry Figure 2.

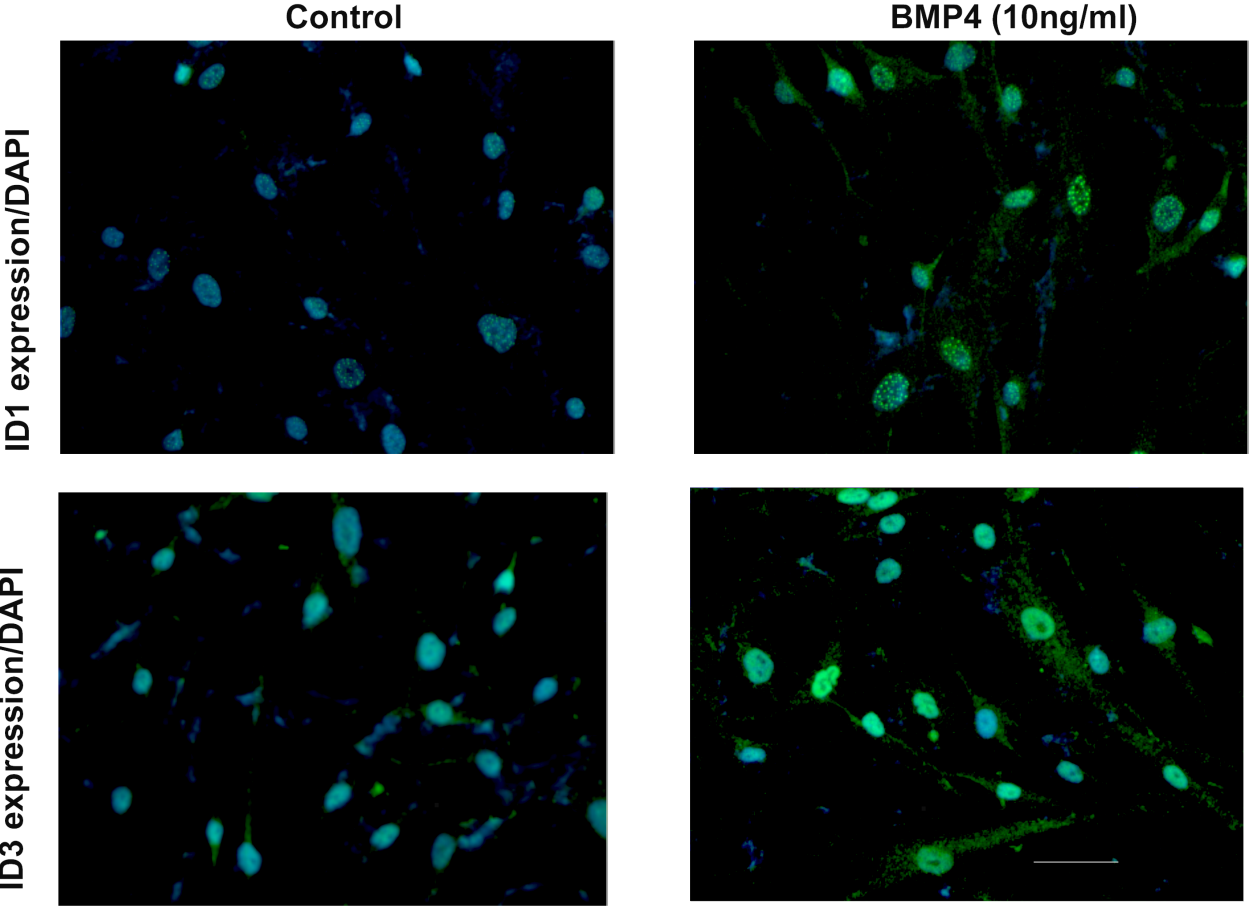

## Supplementary Figure Legends

Supplementary Figure 1. Effect of TGF $\beta$ 2 on the expression of ID1, ID2, and ID3 mRNA in TM cells. Five human primary TM cell strains were treated with TGF $\beta$ 2 (5ng/ml), and mRNA was isolated post TGF $\beta$ 2 treatment. There was no significant change in the expression of ID2 and ID3. However, ID1 showed an apparent increase in expression, but due to the high variability observed among the cell strains, this was not statistically significant.

Supplementary Figure 2. ID1 and ID3 expression increased in the nucleus and cytoplasm post BMP4 (10ng/ml) treatment (12 hrs). Higher magnified 400X images suggest increased nucleus
